# Supplementary material for: A simulation-based curriculum to introduce key teamwork principles to entering medical students
Source: PubMed Central journal article supplement (PMC5112730; doi:10.1186/s12909-016-0808-9), 2016-11-16
Supplement: 12909_2016_808_MOESM1_ESM.pdf [file 12909_2016_808_MOESM1_ESM.pdf]

**Table S1. Exercises Used in Teamwork Day 2007 and 2008**

| Exercise             | Source                                                                   | Teaching Method                   | Key Learning Objectives                                                                                                                                                                                                                                                                                                                                                                          |
|----------------------|--------------------------------------------------------------------------|-----------------------------------|--------------------------------------------------------------------------------------------------------------------------------------------------------------------------------------------------------------------------------------------------------------------------------------------------------------------------------------------------------------------------------------------------|
| Getting to Know Who? | M. B. Weinger and Stanford University School of Business (Palo Alto, CA) | Group discussion                  | <p>This exercise was designed to facilitate the development of a non-judgmental atmosphere in the group. It will also allow individuals in the early stages of team development to:</p> <ul style="list-style-type: none"> <li>• Gain an appreciation of group diversity.</li> <li>• Practice decision making in a low-risk setting.</li> <li>• Deal with conflict.</li> </ul>                   |
| Colour Blind™        | RSVP Design (Johnstone, Scotland, UK)                                    | Team cognitive exercise           | <p>This exercise was designed to:</p> <ul style="list-style-type: none"> <li>• Refine skills that will help ensure common understanding (sense making) between team members.</li> <li>• Emphasize the importance of checking and feedback.</li> <li>• Demonstrate how communication can break down in teams, and to enable teams to identify and rectify such communication failures.</li> </ul> |
| Mission to Burundi   | J. Slagle and Vanderbilt University School of Medicine (Nashville, TN)   | Role play and decision evaluation | <p>This role play exercise was designed to:</p> <ul style="list-style-type: none"> <li>• Emphasize the factors that improve or impede team performance.</li> <li>• Highlight relative contributions of individual</li> </ul>                                                                                                                                                                     |

|                                   |                                                                            |                                       |                                                                                                                                                                                                                                                                                                                                                                                                                                                                                             |
|-----------------------------------|----------------------------------------------------------------------------|---------------------------------------|---------------------------------------------------------------------------------------------------------------------------------------------------------------------------------------------------------------------------------------------------------------------------------------------------------------------------------------------------------------------------------------------------------------------------------------------------------------------------------------------|
|                                   |                                                                            |                                       | <p>team members versus the collective wisdom of the team as a whole.</p> <ul style="list-style-type: none"> <li>• Explore the concept of “Groupthink” (social pressures to agree).</li> </ul>                                                                                                                                                                                                                                                                                               |
| Williams Medical Center™          | The Harvard Negotiation Project™ (Cambridge, MA)                           | Multiparty negotiation with role play | <p>This role-play exercise teaches the students basic multiparty negotiation skills including:</p> <ul style="list-style-type: none"> <li>• Evaluate options and positions before and then during the bargaining process.</li> <li>• Importance of separating personalities from the problems that must be resolved.</li> <li>• Communicate effectively in an adversarial situation.</li> <li>• Introduction to contingent agreements and post-settlement settlements.</li> </ul>           |
| Ward Rounds at Jefferson Hospital | M. B. Weinger and Vanderbilt University School of Medicine (Nashville, TN) | Role play with a Standardized Patient | <p>This role-play exercise teaches the students more advanced negotiation and patient-interaction skills including:</p> <ul style="list-style-type: none"> <li>• Understand the importance of and methods for team resolution of conflict situations.</li> <li>• Understand and overcome barriers to effective communication.</li> <li>• Effective information transfer (especially listening) - obtaining input and information from everyone on the team and from the patient.</li> </ul> |

|                                           |                                                                        |                                                                                                                                                         |                                                                                                                                                                                                                                                                                                                                                                                                                                                                                                                  |
|-------------------------------------------|------------------------------------------------------------------------|---------------------------------------------------------------------------------------------------------------------------------------------------------|------------------------------------------------------------------------------------------------------------------------------------------------------------------------------------------------------------------------------------------------------------------------------------------------------------------------------------------------------------------------------------------------------------------------------------------------------------------------------------------------------------------|
|                                           |                                                                        |                                                                                                                                                         | <ul style="list-style-type: none"> <li>• Importance of interpersonal and cultural differences, and their influence on team decision-making.</li> <li>• Integrating patient preferences into care decisions especially when they are in conflict with the providers' preferences.</li> </ul>                                                                                                                                                                                                                      |
| Crisis on Flight 1974                     | R. Booker and Vanderbilt University School of Medicine (Nashville, TN) | Role play with high fidelity simulator (SimMan™) and simulated passengers (actors) in 2007. Only simulated passengers were used in 2008 and thereafter. | <p>This exercise introduces students to the principles of crisis resource management (CRM) including:</p> <ul style="list-style-type: none"> <li>• Recognition and assumption of team roles (leaders and followers).</li> <li>• Team communication skills especially closing the loop and cross-checking.</li> <li>• Resource identification and management including calling for help, getting what you need.</li> <li>• Situation Assessment including dynamic changes in an open mind.<sup>5</sup></li> </ul> |
| <b>New Exercise for Teamwork Day 2009</b> |                                                                        |                                                                                                                                                         |                                                                                                                                                                                                                                                                                                                                                                                                                                                                                                                  |
| Pediatric Surgery Scramble                | Vanderbilt University School of Medicine                               | Team exercise with Simulated Clinicians                                                                                                                 | <p>This exercise was designed to get students to:</p> <ul style="list-style-type: none"> <li>• Appreciate challenges inherent in complex interdisciplinary health care delivery.</li> <li>• Provide an introduction to the life of an inpatient house staff physician or third year clerk.</li> </ul>                                                                                                                                                                                                            |

|                                            |                                                                         |                        |                                                                                                                                                                                                                                                                                                                                                                                         |
|--------------------------------------------|-------------------------------------------------------------------------|------------------------|-----------------------------------------------------------------------------------------------------------------------------------------------------------------------------------------------------------------------------------------------------------------------------------------------------------------------------------------------------------------------------------------|
|                                            |                                                                         |                        | <ul style="list-style-type: none"> <li>• Develop and maintain effective goal-oriented team coordination.</li> <li>• Develop strategies to maintain cohesive distributed teamwork.</li> <li>• Learn preparation, planning, direction and execution of the team goals and objectives.</li> <li>• Foster team assessment and provide process feedback related to team progress.</li> </ul> |
| <b>New Exercises for Teamwork Day 2010</b> |                                                                         |                        |                                                                                                                                                                                                                                                                                                                                                                                         |
| <i>Name Game</i>                           | M. Weinger and Vanderbilt University School of Medicine (Nashville, TN) | Group discussion       | <p>This exercise was designed to replace “Getting to Know Who” and facilitate the development of a non-judgmental atmosphere in the group. It also allows individuals in the early stages of team development to:</p> <ul style="list-style-type: none"> <li>• Gain an appreciation of group diversity.</li> <li>• Engage in team conversation and learning.</li> </ul>                 |
| <i>Get to Your Spot</i>                    | Origin unknown                                                          | Team physical exercise | <p>This simple exercise was designed to:</p> <ul style="list-style-type: none"> <li>• Demonstrate the difference between pursuing team goals versus individual goal.</li> </ul>                                                                                                                                                                                                         |
