# Supplementary material for: A simulation-based curriculum to introduce key teamwork principles to entering medical students
Source: PubMed Central journal article supplement (PMC5112730; doi:10.1186/s12909-016-0808-9), 2016-11-16
Supplement: 12909_2016_808_MOESM2_ESM.pdf [file 12909_2016_808_MOESM2_ESM.pdf]

**Table S2. Teamwork Day Course and Exercise Evaluations Across the Years**

|                                                                                                           |      | Count / Missing | Mean $\pm$ (SD) | Median (IQR) | Signif. Change 2007 to 2008?               | 2008 vs. 2007 (ref) | Signif. Change 2008 to 2009?                | 2009 vs. 2008 (ref) | Signif. Change 2009 to 2010? | 2010 vs. 2009 (ref) |
|-----------------------------------------------------------------------------------------------------------|------|-----------------|-----------------|--------------|--------------------------------------------|---------------------|---------------------------------------------|---------------------|------------------------------|---------------------|
|                                                                                                           |      |                 |                 |              |                                            |                     |                                             | OR<br>(95% CI)<br>P |                              |                     |
| <b>Overall Course Evaluation Questions</b>                                                                |      |                 |                 |              |                                            |                     |                                             |                     |                              |                     |
| 1. The course developed skills and techniques required to effectively collaborate with other team members | 2007 | 103 / 0         | 6.0 $\pm$ (0.8) | 6.0 (2.0)    |                                            |                     |                                             |                     |                              |                     |
|                                                                                                           | 2008 | 100 / 0         | 6.0 $\pm$ (1.0) | 6.0 (1.0)    |                                            | 1.19<br>(0.74–1.91) |                                             | 1.30<br>(0.82–2.05) |                              | 1.04<br>(0.67–1.60) |
|                                                                                                           | 2009 | 110 / 1         | 6.2 $\pm$ (0.8) | 6.0 (1.0)    |                                            |                     |                                             |                     |                              |                     |
|                                                                                                           | 2010 | 101 / 0         | 6.1 $\pm$ (0.9) | 6.0 (1.0)    |                                            | 0.48                |                                             | 0.27                |                              | 0.87                |
| 2. Handouts and other distributed materials were valuable supplements to the course                       | 2007 | 103 / 0         | 5.4 $\pm$ (1.1) | 5.0 (1.0)    |                                            |                     |                                             |                     |                              |                     |
|                                                                                                           | 2008 | 100 / 0         | 5.4 $\pm$ (1.1) | 5.5 (1.0)    |                                            | 1.09<br>(0.65–1.81) |                                             | 2.11<br>(1.28–3.50) |                              | 0.85<br>(0.50–1.42) |
|                                                                                                           | 2009 | 111 / 0         | 5.8 $\pm$ (1.1) | 6.0 (2.0)    | Revised syllabus and changed some readings | 0.75                | Major revision of syllabus and new readings | <b>0.004 *</b>      |                              | 0.53                |
|                                                                                                           | 2010 | 100 / 1         | 5.8 $\pm$ (1.0) | 6.0 (1.2)    |                                            |                     |                                             |                     |                              |                     |
| 3. The course resulted                                                                                    | 2007 | 103 / 0         | 5.6 $\pm$ (0.9) | 6.0 (1.0)    | Improved                                   | 1.69                |                                             | 1.23                |                              | 0.81                |

|                                                                                |      |         |             |           |                   |                               |                                                                                                    |                                       |                                                                     |                                         |
|--------------------------------------------------------------------------------|------|---------|-------------|-----------|-------------------|-------------------------------|----------------------------------------------------------------------------------------------------|---------------------------------------|---------------------------------------------------------------------|-----------------------------------------|
| in further development of my decision-making abilities                         | 2008 | 99 / 1  | 5.8 ± (1.0) | 6.0 (1.0) | several exercises | (1.07–2.67)<br><b>0.026 *</b> |                                                                                                    | (0.75–2.03)<br>0.41                   |                                                                     | (0.47 – 1.41)<br>0.46                   |
|                                                                                | 2009 | 111 / 0 | 5.9 ± (1.1) | 6.0 (2.0) |                   |                               |                                                                                                    |                                       |                                                                     |                                         |
|                                                                                | 2010 | 101 / 0 | 5.8 ± (1.1) | 6.0 (2.0) |                   |                               |                                                                                                    |                                       |                                                                     |                                         |
| 4. Team facilitator was effective                                              | 2007 | 101 / 2 | 6.6 ± (0.6) | 7.0 (1.0) |                   | 1.00<br>(0.58–1.71)<br>0.99   | Culled out facilitators with the lowest evaluations                                                | 2.01<br>(1.09–3.71)<br><b>0.025 *</b> | Several of the best facilitators from 2009 were unavailable in 2010 | 0.52<br>(0.28 – 0.97)<br><b>0.040 *</b> |
|                                                                                | 2008 | 99 / 1  | 6.4 ± (1.1) | 7.0 (1.0) |                   |                               |                                                                                                    |                                       |                                                                     |                                         |
|                                                                                | 2009 | 109 / 2 | 6.7 ± (0.7) | 7.0 (0.0) |                   |                               |                                                                                                    |                                       |                                                                     |                                         |
|                                                                                | 2010 | 99 / 2  | 6.5 ± (0.9) | 7.0 (1.0) |                   |                               |                                                                                                    |                                       |                                                                     |                                         |
| 5. The facilitators and instructors provided useful feedback                   | 2007 | 103 / 0 | 6.4 ± (0.7) | 6.0 (1.0) |                   | 0.86<br>(0.52–1.41)<br>0.54   | Culled out facilitators with the lowest evaluations & added dedicated debriefers for all exercises | 1.97<br>(1.20–3.24)<br><b>0.008 *</b> |                                                                     | 0.76<br>(0.45 – 1.27)<br>0.29           |
|                                                                                | 2008 | 100 / 0 | 6.2 ± (1.0) | 6.0 (1.0) |                   |                               |                                                                                                    |                                       |                                                                     |                                         |
|                                                                                | 2009 | 111 / 0 | 6.5 ± (0.7) | 7.0 (1.0) |                   |                               |                                                                                                    |                                       |                                                                     |                                         |
|                                                                                | 2010 | 101 / 0 | 6.4 ± (0.9) | 7.0 (1.0) |                   |                               |                                                                                                    |                                       |                                                                     |                                         |
| 6. I gained more insight into my own strengths and weaknesses as a team member | 2007 | 103 / 0 | 5.8 ± (1.1) | 6.0 (2.0) |                   | 1.25<br>(0.69–2.25)<br>0.46   |                                                                                                    | 1.21<br>(0.72–2.02)<br>0.47           |                                                                     | 1.03<br>(0.61 – 1.74)<br>0.90           |
|                                                                                | 2008 | 100 / 0 | 5.8 (1.1)   | 6.0 (2.0) |                   |                               |                                                                                                    |                                       |                                                                     |                                         |
|                                                                                | 2009 | 110 / 1 | 6.0 (1.1)   | 6.0 (1.0) |                   |                               |                                                                                                    |                                       |                                                                     |                                         |
|                                                                                | 2010 | 101 / 0 | 5.9 (1.2)   | 6.0 (2.0) |                   |                               |                                                                                                    |                                       |                                                                     |                                         |

|                                                                                            |      |         |             |           |                                                    |                |  |             |                                                          |             |
|--------------------------------------------------------------------------------------------|------|---------|-------------|-----------|----------------------------------------------------|----------------|--|-------------|----------------------------------------------------------|-------------|
| 7. I learned to identify the essential behaviors which make a team effective               | 2007 | 103 / 0 | 5.8 ± (0.9) | 6.0 (1.0) |                                                    | 0.97           |  | 1.43        |                                                          | 1.16        |
|                                                                                            | 2008 | 100 / 0 | 5.7 ± (1.1) | 6.0 (1.0) |                                                    | (0.60–1.57)    |  | (0.87–2.34) |                                                          | (0.70–1.94) |
|                                                                                            | 2009 | 111 / 0 | 5.9 ± (1.0) | 6.0 (2.0) |                                                    | 0.89           |  | 0.15        |                                                          | 0.56        |
|                                                                                            | 2010 | 101 / 0 | 6.0 ± (0.9) | 6.0 (2.0) |                                                    |                |  |             |                                                          |             |
| 8. This course will help me to become a more effective team member of the health care team | 2007 | 101 / 2 | 5.9 ± (0.9) | 6.0 (2.0) |                                                    | 1.25           |  | 1.53        |                                                          | 1.07        |
|                                                                                            | 2008 | 100 / 0 | 6.0 ± (1.0) | 6.0 (1.0) |                                                    | (0.77–2.03)    |  | (0.94–2.50) |                                                          | (0.63–1.84) |
|                                                                                            | 2009 | 111 / 0 | 6.2 ± (0.9) | 6.0 (1.0) |                                                    | 0.37           |  | 0.09        |                                                          | 0.80        |
|                                                                                            | 2010 | 101 / 0 | 6.2 ± (1.0) | 6.0 (1.0) |                                                    |                |  |             |                                                          |             |
| <b>Teamwork Day Exercise</b>                                                               |      |         |             |           |                                                    |                |  |             |                                                          |             |
| 1. <i>Getting to know who?</i>                                                             | 2007 | 100 / 3 | 5.3 ± (1.3) | 5.0 (1.0) |                                                    | 0.83           |  | 0.76        | Replaced by <i>Name Game</i> and <i>Get to Your Spot</i> |             |
|                                                                                            | 2008 | 97 / 3  | 5.2 ± (1.3) | 5.0 (1.0) |                                                    | (0.52–1.35)    |  | (0.47–1.21) |                                                          |             |
|                                                                                            | 2009 | 110 / 1 | 4.9 ± (1.5) | 5.0 (2.0) |                                                    | 0.46           |  | 0.24        |                                                          |             |
| 2. <i>Name Game</i>                                                                        | 2010 | 101 / 0 | 5.2 ± (1.3) | 5.0 (1.0) |                                                    |                |  |             |                                                          |             |
| 3. <i>Get to Your Spot</i>                                                                 | 2010 | 100 / 1 | 4.1 ± (1.8) | 4.5 (2.0) |                                                    |                |  |             |                                                          |             |
| 4. <i>Williams County Medical Center</i>                                                   | 2007 | 100 / 3 | 5.2 ± (1.4) | 5.0 (2.0) | Changed exercise order so this one always preceded | 1.72           |  | 0.76        |                                                          | 0.76        |
|                                                                                            | 2008 | 97 / 3  | 5.8 ± (1.1) | 6.0 (2.0) |                                                    | (1.02–2.89)    |  | (0.48–1.20) |                                                          | (0.46–1.27) |
|                                                                                            | 2009 | 110 / 1 | 5.5 ± (1.4) | 6.0 (1.0) |                                                    | <b>0.041 *</b> |  | 0.23        |                                                          |             |

|                                                          |      |         |             |           |                                                           |                                              |                                                  |                                                  |                       |                               |  |
|----------------------------------------------------------|------|---------|-------------|-----------|-----------------------------------------------------------|----------------------------------------------|--------------------------------------------------|--------------------------------------------------|-----------------------|-------------------------------|--|
|                                                          | 2010 | 101 / 0 | 5.3 ± (1.5) | 6.0 (2.0) | <i>Ward Rounds</i>                                        |                                              |                                                  |                                                  |                       | 0.29                          |  |
| 5. <i>Mission to Burundi</i>                             | 2007 | 100 / 3 | 5.4 ± (1.3) | 6.0 (1.0) |                                                           | 0.92<br>(0.56–1.49)<br>0.72                  | Replaced by<br><i>Pediatric Surgery Scramble</i> |                                                  |                       |                               |  |
|                                                          | 2008 | 97 / 3  | 5.3 ± (1.1) | 5.0 (1.0) |                                                           |                                              |                                                  |                                                  |                       |                               |  |
| 6. <i>Pediatric Surgery Scramble</i>                     | 2009 | 110 / 1 | 5.8 ± (1.2) | 6.0 (2.0) |                                                           |                                              |                                                  | Reduced number of tasks required to be completed | 1.29<br>(0.73 – 2.28) |                               |  |
|                                                          | 2010 | 101 / 0 | 5.8 ± (1.4) | 6.0 (2.0) |                                                           |                                              |                                                  |                                                  |                       | 0.39                          |  |
| 7. <i>Ward Rounds at Jefferson County Medical Center</i> | 2007 | 100 / 3 | 6.5 ± (0.8) | 7.0 (1.0) |                                                           | 1.05<br>(0.58 – 1.90)<br>0.88                |                                                  | 0.75<br>(0.43–1.31)<br>0.31                      |                       | 1.04<br>(0.61 – 1.79)<br>0.88 |  |
|                                                          | 2008 | 97 / 3  | 6.5 ± (0.9) | 7.0 (1.0) |                                                           |                                              |                                                  |                                                  |                       |                               |  |
|                                                          | 2009 | 110 / 1 | 6.4 ± (0.9) | 7.0 (1.0) |                                                           |                                              |                                                  |                                                  |                       |                               |  |
|                                                          | 2010 | 101 / 0 | 6.5 ± (0.8) | 7.0 (1.0) |                                                           |                                              |                                                  |                                                  |                       |                               |  |
| 8. <i>Crisis on Flight 1974</i>                          | 2007 | 99 / 4  | 5.1 ± (1.6) | 5.0 (2.0) | Cut team size from 10 to 5 & changed from mannequin to SP | 3.92<br>(2.24–6.86)<br><b>&lt;0.001</b><br>* |                                                  | 1.13<br>(0.69–1.85)<br>0.62                      |                       | 0.83<br>(0.50 – 1.38)<br>0.47 |  |
|                                                          | 2008 | 97 / 3  | 6.0 ± (1.1) | 6.0 (1.0) |                                                           |                                              |                                                  |                                                  |                       |                               |  |
|                                                          | 2009 | 109 / 2 | 6.0 ± (1.3) | 6.0 (1.0) |                                                           |                                              |                                                  |                                                  |                       |                               |  |

|                     |      |         |             |           |                                        |                                 |  |                                 |  |                                     |
|---------------------|------|---------|-------------|-----------|----------------------------------------|---------------------------------|--|---------------------------------|--|-------------------------------------|
|                     | 2010 | 101 / 0 | 5.9 ± (1.2) | 6.0 (2.0) | passenger<br>(see text for<br>details) |                                 |  |                                 |  |                                     |
| <i>Colour Blind</i> | 2007 | 100 / 3 | 6.0 (1.1)   | 6.0 (1.0) |                                        | 1.19<br>(0.72-<br>1.98)<br>0.50 |  | 1.23<br>(0.71-<br>2.11)<br>0.46 |  | 1.44<br>(0.85<br>-<br>2.44)<br>0.18 |
|                     | 2008 | 97 / 3  | 6.1 (1.0)   | 6.0 (2.0) |                                        |                                 |  |                                 |  |                                     |
|                     | 2009 | 109 / 2 | 6.2 (1.1)   | 7.0 (1.0) |                                        |                                 |  |                                 |  |                                     |
|                     | 2010 | 101 / 0 | 6.4 (1.0)   | 7.0 (1.0) |                                        |                                 |  |                                 |  |                                     |

5

Evaluation scores ranged from 1 (worst) to 7 (best).

Temporal comparisons of course evaluations. Two ordinal (proportional odds) logistic regression models were estimated, along with their robust standard errors, to characterize the association between scores and the course evaluations and between scores and exercises while adjusting for year and exercise order number. Linear combinations of estimates were calculated to summarize temporal differences.

\* = P<0.05 indicating statistically significant difference for this comparison
