# Supplementary material for: A simulation-based curriculum to introduce key teamwork principles to entering medical students
Source: PubMed Central journal article supplement (PMC5112730; doi:10.1186/s12909-016-0808-9), 2016-11-16
Supplement: 12909_2016_808_MOESM3_ESM.pdf [file 12909_2016_808_MOESM3_ESM.pdf]

**Table S3. Yearly Comparison of Exercises (*P* values)**

|                             |      | OR<br>95% CI<br>P    | OR<br>95% CI<br>P                                  | OR<br>95% CI<br>P                                  | OR<br>95% CI<br>P                                 | OR<br>95% CI<br>P                            | OR<br>95% CI<br>P              | OR<br>95% CI<br>P                                 | OR<br>95% CI<br>P | OR<br>95% CI<br>P |
|-----------------------------|------|----------------------|----------------------------------------------------|----------------------------------------------------|---------------------------------------------------|----------------------------------------------|--------------------------------|---------------------------------------------------|-------------------|-------------------|
| <b>Exercises</b>            |      | Getting to Know Who? | Colour Blind™                                      | Ward Rounds at Jefferson County Medical Center     | Crisis on Flight 1974                             | Williams Medical Center                      | Mission to Burundi             | Pediatric Surgery Scramble                        | Name Game         | Get to your Spot  |
| <i>Getting to Know Who?</i> | 2007 | -                    | <b>2.75</b><br>(1.71 – 4.43)<br><b>&lt;0.001</b>   | <b>7.61</b><br>(4.11 – 14.08)<br><b>&lt; 0.001</b> | 0.71<br>(0.37 – 1.36)<br>0.303                    | 0.91<br>(0.49 – 1.66)<br>0.748               | 0.94<br>(0.50 – 1.74)<br>0.835 | -                                                 | -                 | -                 |
|                             | 2008 | -                    | <b>3.92</b><br>(2.36 – 6.51)<br><b>&lt; 0.001</b>  | <b>9.54</b><br>(5.46 – 16.68)<br><b>&lt; 0.001</b> | <b>3.33</b><br>(1.93 – 5.76)<br><b>&lt; 0.001</b> | 1.87<br>(1.04 – 3.34)<br>0.036               | 1.03<br>(0.62 – 1.69)<br>0.916 | -                                                 | -                 | -                 |
|                             | 2009 | -                    | <b>6.36</b><br>(3.80 – 10.65)<br><b>&lt; 0.001</b> | <b>9.48</b><br>(5.57 – 16.12)<br><b>&lt; 0.001</b> | <b>4.98</b><br>(2.84 – 8.75)<br><b>&lt; 0.001</b> | <b>1.87</b><br>(1.01 – 3.45)<br><b>0.045</b> | -                              | <b>3.06</b><br>(1.75 – 5.35)<br><b>&lt; 0.001</b> | -                 | -                 |

|                         |      |                                                          |                                                             |                                                             |                                                            |                                                          |                                                          |                                                           |                                                          |                                                          |
|-------------------------|------|----------------------------------------------------------|-------------------------------------------------------------|-------------------------------------------------------------|------------------------------------------------------------|----------------------------------------------------------|----------------------------------------------------------|-----------------------------------------------------------|----------------------------------------------------------|----------------------------------------------------------|
| <i>Name Game</i>        | 2010 |                                                          | <b>7.06</b><br><i>(4.32 – 11.52)</i><br><b>&lt; 0.001</b>   | <b>7.62</b><br><i>(4.24 – 13.69)</i><br><b>&lt; 0.001</b>   | <b>3.18</b><br><i>(1.72 – 5.90)</i><br><b>&lt;0.001</b>    | 1.10<br>(0.58 – 2.07)<br>0.776                           | –                                                        | <b>3.04</b><br><i>(1.60 – 5.75)</i><br><b>0.001</b>       | –                                                        | <b>0.31</b><br><i>(0.19 – 0.52)</i><br><b>&lt; 0.001</b> |
| <i>Get to your Spot</i> | 2010 | –                                                        | <b>22.66</b><br><i>(12.92 – 39.75)</i><br><b>&lt; 0.001</b> | <b>24.47</b><br><i>(12.82 – 46.72)</i><br><b>&lt; 0.001</b> | <b>10.23</b><br><i>(5.21 – 20.07)</i><br><b>&lt; 0.001</b> | <b>3.52</b><br><i>(1.77 – 7.02)</i><br><b>&lt; 0.001</b> | –                                                        | <b>9.75</b><br><i>(4.87 – 19.53)</i><br><b>&lt; 0.001</b> | <b>3.21</b><br><i>(1.91 – 5.39)</i><br><b>&lt; 0.001</b> | –                                                        |
| <i>Colour Blind™</i>    | 2007 | <b>0.36</b><br><i>(0.23 – 0.59)</i><br><b>&lt; 0.001</b> | –                                                           | <b>2.77</b><br><i>(1.53 – 5.03)</i><br><b>0.001</b>         | <b>0.26</b><br><i>(0.14 – 0.49)</i><br><b>&lt; 0.001</b>   | <b>0.33</b><br><i>(0.18 – 0.59)</i><br><b>&lt; 0.001</b> | <b>0.34</b><br><i>(0.19 – 0.62)</i><br><b>&lt; 0.001</b> | –                                                         | –                                                        | –                                                        |
|                         | 2008 | <b>0.25</b><br><i>(0.15 – 0.42)</i><br><b>&lt; 0.001</b> | –                                                           | <b>2.43</b><br><i>(1.34 – 4.42)</i><br><b>0.004</b>         | 0.85<br>(0.47 – 1.53)<br>0.588                             | <b>0.48</b><br><i>(0.25 – 0.89)</i><br><b>0.020</b>      | <b>0.26</b><br><i>(0.15 – 0.45)</i><br><b>&lt; 0.001</b> | –                                                         | –                                                        | –                                                        |
|                         | 2009 | <b>0.16</b><br><i>(0.09 – 0.26)</i><br><b>&lt; 0.001</b> | –                                                           | 1.49<br>(0.86 – 2.59)<br>0.157                              | 0.78<br>(0.44 – 1.41)<br>0.414                             | <b>0.29</b><br><i>(0.16 – 0.56)</i><br><b>&lt; 0.001</b> | –                                                        | <b>0.48</b><br><i>(0.27 – 0.86)</i><br><b>0.014</b>       | –                                                        | –                                                        |
|                         | 2010 | –                                                        | –                                                           | 1.08<br>(0.58 – 1.99)<br>0.806                              | <b>0.45</b><br><i>(0.24 – 0.86)</i><br><b>0.015</b>        | <b>0.16</b><br><i>(0.08 – 0.30)</i><br><b>&lt; 0.001</b> | –                                                        | <b>0.43</b><br><i>(0.22 – 0.84)</i><br><b>0.013</b>       | <b>0.14</b><br><i>(0.09 – 0.23)</i><br><b>&lt; 0.001</b> | <b>0.04</b><br><i>(0.03 – 0.08)</i><br><b>&lt; 0.001</b> |

|                                                       |      |                                                          |                                                          |                                                            |                                                          |                                                          |                                                          |                                                          |                                                          |                                                          |
|-------------------------------------------------------|------|----------------------------------------------------------|----------------------------------------------------------|------------------------------------------------------------|----------------------------------------------------------|----------------------------------------------------------|----------------------------------------------------------|----------------------------------------------------------|----------------------------------------------------------|----------------------------------------------------------|
| <i>Ward Rounds at Jefferson County Medical Center</i> | 2007 | <b>0.13</b><br><i>(0.07 – 0.24)</i><br><b>&lt; 0.001</b> | <b>0.36</b><br><i>(0.20 – 0.66)</i><br><b>0.001</b>      | –                                                          | <b>0.09</b><br><i>(0.05 – 0.16)</i><br><b>&lt; 0.001</b> | <b>0.12</b><br><i>(0.07 – 0.20)</i><br><b>&lt; 0.001</b> | <b>0.12</b><br><i>(0.07 – 0.21)</i><br><b>&lt; 0.001</b> | –                                                        | –                                                        | –                                                        |
|                                                       | 2008 | <b>0.10</b><br><i>(0.06 – 0.18)</i><br><b>&lt; 0.001</b> | <b>0.41</b><br><i>(0.23 – 0.75)</i><br><b>0.004</b>      | –                                                          | <b>0.35</b><br><i>(0.20 – 0.62)</i><br><b>&lt; 0.001</b> | <b>0.20</b><br><i>(0.11 – 0.36)</i><br><b>&lt; 0.001</b> | <b>0.11</b><br><i>(0.06 – 0.18)</i><br><b>&lt; 0.001</b> | –                                                        | –                                                        | –                                                        |
|                                                       | 2009 | <b>0.11</b><br><i>(0.06 – 0.18)</i><br><b>&lt; 0.001</b> | 0.67<br><i>(0.39 – 1.17)</i><br>0.157                    | –                                                          | <b>0.53</b><br><i>(0.31 – 0.89)</i><br><b>0.016</b>      | <b>0.20</b><br><i>(0.11 – 0.35)</i><br><b>&lt; 0.001</b> | –                                                        | <b>0.32</b><br><i>(0.19 – 0.54)</i><br><b>&lt; 0.001</b> | –                                                        | –                                                        |
|                                                       | 2010 | –                                                        | 0.93<br><i>(0.50 – 1.71)</i><br>0.806                    | –                                                          | <b>0.42</b><br><i>(0.24 – 0.72)</i><br><b>0.002</b>      | <b>0.14</b><br><i>(0.08 – 0.26)</i><br><b>&lt; 0.001</b> | –                                                        | <b>0.40</b><br><i>(0.23 – 0.70)</i><br><b>0.001</b>      | <b>0.13</b><br><i>(0.07 – 0.24)</i><br><b>&lt; 0.001</b> | <b>0.04</b><br><i>(0.02 – 0.08)</i><br><b>&lt; 0.001</b> |
| <i>Crisis on Flight 1974</i>                          | 2007 | 1.41<br><i>(0.73 – 2.70)</i><br>0.303                    | <b>3.87</b><br><i>(2.05 – 7.31)</i><br><b>&lt; 0.001</b> | <b>10.71</b><br><i>(6.18 – 18.56)</i><br><b>&lt; 0.001</b> | –                                                        | 1.28<br><i>(0.73 – 2.24)</i><br>0.397                    | 1.32<br><i>(0.76 – 2.28)</i><br>0.323                    | –                                                        | –                                                        | –                                                        |
|                                                       | 2008 | <b>0.30</b><br><i>(0.71- 0.52)</i><br><b>&lt; 0.001</b>  | 1.18<br><i>(0.65 – 2.12)</i><br>0.588                    | <b>2.86</b><br><i>(1.61 – 5.08)</i><br><b>&lt; 0.001</b>   | –                                                        | <b>0.56</b><br><i>(0.34 – 0.92)</i><br><b>0.021</b>      | <b>0.31</b><br><i>(0.19 – 0.49)</i><br><b>&lt; 0.001</b> | –                                                        | –                                                        | –                                                        |

|                                |      |                                                          |                                                           |                                                           |                                                          |                                                          |                                       |                                                     |                                                          |                                                          |
|--------------------------------|------|----------------------------------------------------------|-----------------------------------------------------------|-----------------------------------------------------------|----------------------------------------------------------|----------------------------------------------------------|---------------------------------------|-----------------------------------------------------|----------------------------------------------------------|----------------------------------------------------------|
|                                | 2009 | <b>0.20</b><br><i>(0.11 – 0.35)</i><br><b>&lt; 0.001</b> | 1.28<br><i>(0.71 – 2.29)</i><br>0.414                     | <b>1.90</b><br><i>(1.13 – 3.21)</i><br><b>0.016</b>       | –                                                        | <b>0.38</b><br><i>(0.23 – 0.61)</i><br><b>&lt; 0.001</b> | –                                     | <b>0.61</b><br><i>(0.37 – 1.01)</i><br><b>0.054</b> | –                                                        | –                                                        |
|                                | 2010 | –                                                        | <b>2.22</b><br><i>(1.17 – 4.21)</i><br><b>0.015</b>       | <b>2.39</b><br><i>(1.38 – 4.14)</i><br><b>0.002</b>       | –                                                        | <b>0.34</b><br><i>(0.19 – 0.61)</i><br><b>&lt; 0.001</b> | –                                     | 0.95<br><i>(0.53 – 1.71)</i><br>0.872               | <b>0.31</b><br><i>(0.71 – 0.58)</i><br><b>&lt; 0.001</b> | <b>0.10</b><br><i>(0.05 – 0.19)</i><br><b>&lt; 0.001</b> |
| <i>Williams Medical Center</i> | 2007 | 1.10<br><i>(0.60 – 2.02)</i><br>0.748                    | <b>3.03</b><br><i>(1.68 – 5.47)</i><br><b>&lt; 0.001</b>  | <b>8.40</b><br><i>(4.99 – 14.15)</i><br><b>&lt; 0.001</b> | 0.78<br><i>(0.45 – 1.38)</i><br>0.397                    | –                                                        | 1.03<br><i>(0.60 – 1.77)</i><br>0.904 | –                                                   | –                                                        | –                                                        |
|                                | 2008 | <b>0.54</b><br><i>(0.30 – 0.96)</i><br><b>0.036</b>      | <b>2.10</b><br><i>(1.12 – 3.94)</i><br><b>0.020</b>       | <b>5.12</b><br><i>(2.81 – 9.31)</i><br><b>&lt; 0.001</b>  | <b>1.79</b><br><i>(1.09 – 2.93)</i><br><b>0.021</b>      | –                                                        | 0.55<br><i>(0.35 – 0.88)</i><br>0.12  | –                                                   | –                                                        | –                                                        |
|                                | 2009 | <b>0.53</b><br><i>(0.29 – 0.99)</i><br><b>0.045</b>      | <b>3.40</b><br><i>(1.80 – 6.42)</i><br><b>&lt; 0.001</b>  | <b>5.07</b><br><i>(2.87 – 8.93)</i><br><b>&lt; 0.001</b>  | <b>2.66</b><br><i>(1.64 – 4.33)</i><br><b>&lt; 0.001</b> | –                                                        | –                                     | 1.64<br><i>(0.97 – 2.77)</i><br>0.066               | –                                                        | –                                                        |
|                                | 2010 |                                                          | <b>6.44</b><br><i>(3.30 – 12.54)</i><br><b>&lt; 0.001</b> | <b>6.95</b><br><i>(3.87 – 12.49)</i><br><b>&lt; 0.001</b> | <b>2.90</b><br><i>(1.64 – 5.15)</i><br><b>&lt; 0.001</b> | –                                                        | –                                     | <b>2.77</b><br><i>(1.50 – 5.10)</i><br><b>0.001</b> | 0.91<br><i>(0.48 – 1.72)</i><br>0.776                    | <b>0.28</b><br><i>(0.14 – 0.57)</i><br><b>&lt; 0.001</b> |

|                                   |      |                                                          |                                                          |                                                           |                                                          |                                                     |   |   |                                                     |                                                          |
|-----------------------------------|------|----------------------------------------------------------|----------------------------------------------------------|-----------------------------------------------------------|----------------------------------------------------------|-----------------------------------------------------|---|---|-----------------------------------------------------|----------------------------------------------------------|
| <i>Mission to Burundi</i>         | 2007 | 1.07<br>(0.57 – 1.99)<br>0.835                           | <b>2.93</b><br><b>(1.61 – 5.35)</b><br><b>&lt; 0.001</b> | <b>8.13</b><br><b>(4.86 – 13.58)</b><br><b>&lt; 0.001</b> | 0.76<br>(0.44 – 1.31)<br>0.323                           | 0.97<br>(0.56 – 1.66)<br>0.904                      | – | – | –                                                   | –                                                        |
|                                   | 2008 | 0.97<br>(0.59 – 1.60)<br>0.916                           | <b>3.82</b><br><b>(2.21 – 6.60)</b><br><b>&lt; 0.001</b> | <b>9.29</b><br><b>(5.48 – 15.76)</b><br><b>&lt; 0.001</b> | <b>3.25</b><br><b>(2.03 – 5.19)</b><br><b>&lt; 0.001</b> | <b>1.82</b><br><b>(1.14 – 2.89)</b><br><b>0.012</b> | – | – | –                                                   | –                                                        |
| <i>Pediatric Surgery Scramble</i> | 2009 | <b>0.33</b><br><b>(0.19 – 0.57)</b><br><b>&lt; 0.001</b> | <b>2.08</b><br><b>(1.16 – 3.73)</b><br><b>0.014</b>      | <b>3.10</b><br><b>(1.85 – 5.17)</b><br><b>&lt; 0.001</b>  | <b>1.63</b><br><b>(0.99 – 2.67)</b><br><b>0.054</b>      | 0.61<br>(0.36 – 1.03)<br>0.066                      | – | – | –                                                   | –                                                        |
|                                   | 2010 | –                                                        | <b>2.32</b><br><b>(1.20 – 4.52)</b><br><b>0.013</b>      | <b>2.51</b><br><b>(1.42 – 4.43)</b><br><b>0.001</b>       | 1.05<br>(0.59 – 1.88)<br>0.872                           | <b>0.36</b><br><b>(0.20 – 0.66)</b><br><b>0.001</b> | – | – | <b>0.33</b><br><b>(0.17 – 0.62)</b><br><b>0.001</b> | <b>0.10</b><br><b>(0.05 – 0.21)</b><br><b>&lt; 0.001</b> |

Yearly exercise comparisons. An ordinal (proportional odds) logistic regression model was estimated, along with its robust standard errors, to characterize the association between scores and exercises while adjusting for year and exercise order. Linear combinations of estimates were calculated to summarize exercise differences by year. The scores that were statistically significant have been italicized in the table.
